# Supplementary material
Source: PubMed Central journal article supplement (PMC2805209)
Supplement: supp_76_2_451__1.pdf [file supp_76_2_451__1.pdf]

Supplementary FIG. 1.

|                      |                       |                       |
|----------------------|-----------------------|-----------------------|
| <i>glcK</i> locus    | <i>tkt</i> locus      | <i>pyrE</i> locus     |
| 111112233 34         | 11222234 45           | 1222444 45            |
| 4034581856 71        | 2548458946 90         | 2373369024 91         |
| 8683332650 63        | 2291133233 36         | 1315175831 89         |
| glk2th GGTCCGAGTG AG | tkt8th TTGGCCTGTC TA  | pyr11th AGCGGCGACT TG |
| glk3th .....T... ..  | tkt10th .....C. .G    | pyr13th .TT.....TC C. |
| glk5th AA..... ..    | tkt2th ..... ..G      | pyr10th .T.....TC C.  |
| glk1th .A..... ..    | tkt3th .C.....A.. .G  | pyr9th .TT...A.TC C.  |
| glk4th .A.....A ..   | tkt1th .....A.. .G    | pyr5th ...A....TC C.  |
| glk6th .....A..C. TT | tkt7th .C..T..... .G  | pyr4th ...AA...TC C.  |
| glk7th ..CTA..A.. C. | tkt4th .C..... ..G    | pyr12th G..A....TC C. |
| glk8th .....A.. C.   | tkt5th .C....G... .G  | pyr1th .....T..TC C.  |
|                      | tkt6th .C..... ..CG   | pyr2th .....T.GTC C.  |
|                      | tkt11th .C.A.T.... .G | pyr6th .....TC C.     |
|                      | tkt9th CCA.....T .G   | pyr3th ....A...TC C.  |
|                      |                       | pyr7th .....T. C.     |
|                      |                       | pyr8th .....TC CA     |
| <br>                 |                       |                       |
| <i>ddlA</i> locus    | <i>thrS</i> locus     | <i>dnaE</i> locus     |
| 1                    | 111                   | 1234                  |
| 43                   | 7245                  | 3457                  |
| 01                   | 7902                  | 0902                  |
| ddl1th GG            | thr1th GGCC           | dna3th CCGA           |
| ddl2th T.            | thr5th T...           | dna2th ...C           |
| ddl3th TA            | thr2th ...T           | dna1th T..C           |
|                      | thr4th ..AT           | dna4th TT.C           |
|                      | thr3th .T.T           | dna5th T.CC           |
| <br>                 |                       |                       |
| <i>pepO</i> locus    | <i>ilvC</i> locus     |                       |
| 2                    | 1                     |                       |
| 673                  | 5                     |                       |
| 12980                | 5                     |                       |
| pep3th CGTAA         | ilv1th A              |                       |
| pep5th T..C.         | ilv2th T              |                       |
| pep1th ...C.         |                       |                       |
| pep2th ..CC.         |                       |                       |
| pep6th ...CG         |                       |                       |
| pep4th .A.C.         |                       |                       |

Supplementary FIG. 1. Polymorphic nucleotide sites among MLST alleles of *S. thermophilus*.

Variable sites in each allele are found from 27 *S. thermophilus* isolates for all loci, except *glcK*, which was also analyzed in additional 21 strains. The sites are numbered above in vertical format.

Supplementary FIG. 2.

|            |      |             |            |            |           |
|------------|------|-------------|------------|------------|-----------|
|            |      | 111222222   | 334444445  |            |           |
|            |      | 1458125588  | 682456794  |            |           |
|            |      | 5683685713  | 858384052  |            |           |
| S.th-prtS1 | (2)  | CAGTACGGAA  | GTGGCTGTC  |            |           |
| S.th-prtS2 | (1)  | ...CTTTAGG  | ..T.T.AG.  |            |           |
| S.th-prtS3 | (1)  | ....TTTAGG  | ..T.T.AG.  |            |           |
| S.su-prtS1 | (12) | TTACTTTAGG  | .GT.T.AGA  |            |           |
| S.su-prtS2 | (11) | T.ACTTTAGG  | TGTATC.GA  |            |           |
| S.su-prtS3 | (1)  | TTACTTTAGG  | .GTATC.GA  |            |           |
|            |      |             |            | 111111111  | 222223333 |
|            |      |             |            | 333334     |           |
|            |      | 2334456     | 9001245699 | 0223370112 | 357880    |
|            |      | 1478143831  | 8162427609 | 2192874690 | 763250    |
| S.su-eriC6 | (6)  | GTCTTATTTCG | TTAAGACCCA | CCGTCGATCG | ATTGCC    |
| S.su-eriC1 | (4)  | .....T.     | .....G     | .....      | ....T.    |
| S.su-eriC3 | (5)  | AC.....T.   | .....G     | .....      | ....T.    |
| S.su-eriC4 | (1)  | AC.....A    | .....      | .....      | ....T.    |
| S.su-eriC2 | (6)  | AC.....     | .....      | .....      | .....     |
| S.su-eriC5 | (1)  | AC....C...  | .....T.... | .....      | .....     |
| S.th-eriC1 | (3)  | ..TCCG.A.A  | CCTGA.TTGG | T.TATCGCTT | CCA.TT    |
| S.th-eriC2 | (1)  | ..TCCG.A.A  | CCTGA.TTGG | TATATCGCTT | CCA.TT    |

Supplementary FIG.2. Polymorphic nucleotide sites of *prtS* and *eriC* alleles of *S. thermophilus* (S.th) and *S. suis* (S.su) strains. Sequences of fragments from LMD-9, CNRZ703, CNRZ385 and JIM8232 are shown for *S. thermophilus*. Besides sequences of 20 *S. suis* strains isolated from human and pigs, available sequences of fragments from 98HAH33, 05ZYH33, P1/7 and 89/1591 (only for *prtS*) are shown for *S. suis*. Only the variable sites are shown. The sites are numbered above in vertical format. The number of strains corresponding to each allele is indicated in brackets.
